# Supplementary material
Source: Springer Nature journal article supplement (https://www.springermedizin.de/resource/supplementary/12967_2008_302_MOESM1_ESM.pdf/9576170)
Supplement: MOESM1 [file 9576170]

**146 subjects fully investigated**

**108 patients with NAFLD**

**38 patients with CHC**

**LIVER BIOPSY**

**87 out of 108 agreed to undergo it**

**36 out of 38 agreed to undergo it**

**forming two groups**

**forming the control group**

**45 patients with FL    42 patients with NASH**

**36 patients with CHC**
